# Supplementary material
Source: MDPI journal article supplement (https://www.mdpi.com/2073-4441/11/10/2152)

Supplementary material

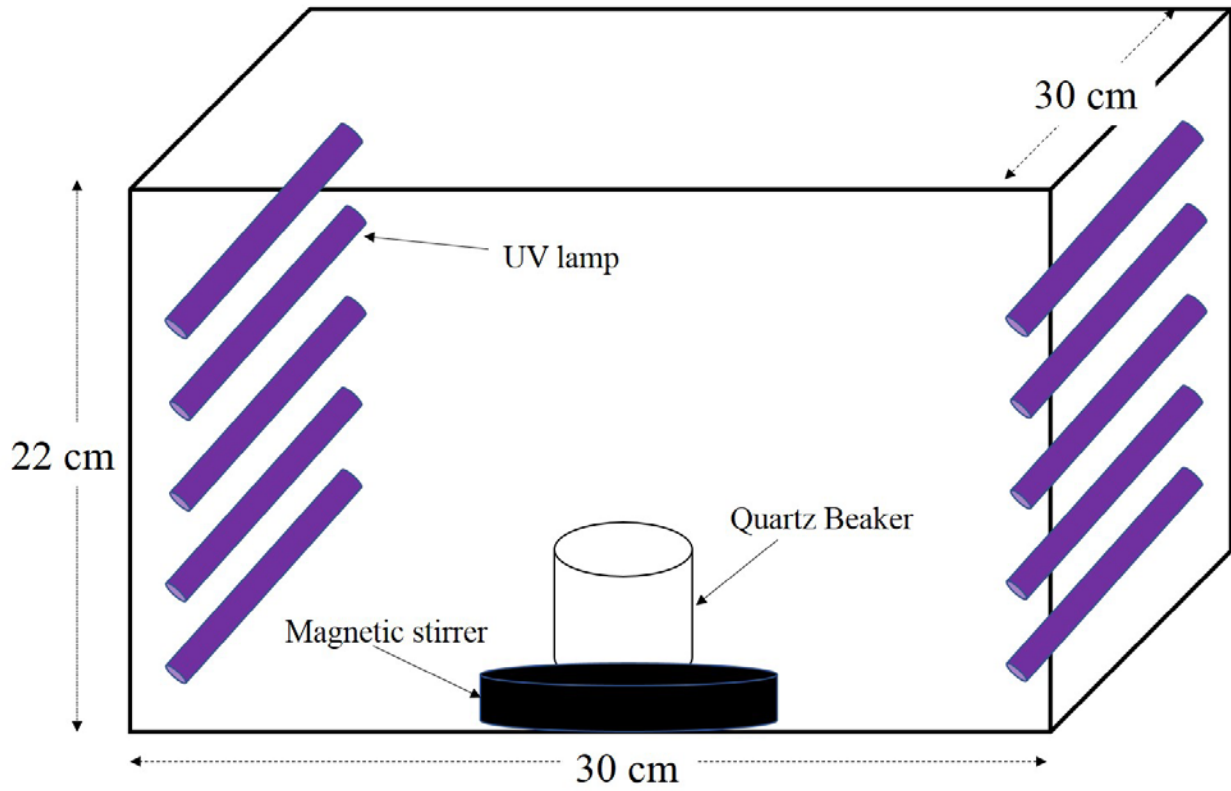

Figure S1 Diagram of the photoreactor

Supplement: s1 [file s1]
